# Supplementary material
Source: publisher site journal article supplement (https://vertebrate-zoology.arphahub.com/article/99495/download/suppl/32/)
Supplement: Supplementary file 1

## Supplementary material 2

### Tables S1-S4

**Authors:** Thomson S, Friol NR, White A, Wedd D, Georges A (2023)

**Data type:** pdf

**Explanation notes:** Supplementary tables as referred to in the main text.

**Copyright notice:** This dataset is made available under the Open Database License (<http://opendatacommons.org/licenses/odbl/1.0>). The Open Database License (ODbL) is a license agreement intended to allow users to freely share, modify, and use this Dataset while maintaining this same freedom for others, provided that the original source and author(s) are credited.

**Table S1.** Matrix of character states in support of the phylogeny of Fig. 8. Characters and character states are as defined in Table S2, 1-106.

**Table S2.** Characters considered of taxonomic value for the Chelidae. Those that could be scored for *Elseya lavarackorum* = *Pelocomastes lavarackorum* (White and Archer, 1994) have an asterisk (\*). Notes are for clarification. Comments pertain to this study.

**Table S3.** Frequency of carapaces with irregular scutes in a population of *Emydura macquarii* nigra on Fraser Island. Only carapaces with irregularities involving insertions or deletions are included. Other variations in scute or sulci shape are not included. N = 670 [from Georges, 1982].

**Table S4.** Frequency of plastra with irregular scutes in a population of *Emydura macquarii* nigra on Fraser Island. Only plastra with major irregularities involving insertions or deletions are included. Other variations in scute or sulci shape are not included. N = 670 [from Georges, 1982].

**Table S1.** Matrix of character states in support of the phylogeny of Fig. 8. Characters and character states are as defined in Table S2, 1-106.

|                          | 1 | 2 | 3 | 4 | 5 | 6 | 7 | 8 | 9 | 10 | 11 | 12 | 13 | 14 | 15 | 16 | 17 | 18 | 19 | 20 |
|--------------------------|---|---|---|---|---|---|---|---|---|----|----|----|----|----|----|----|----|----|----|----|
| <i>E. albagula</i>       | 0 | 1 | 0 | 0 | 0 | 1 | 2 | 0 | 1 | 2  | 0  | 3  | 0  | 0  | 0  | 0  | 0  | 1  | 0  | 0  |
| <i>E. branderhorsti</i>  | 0 | 1 | 0 | 0 | 2 | 1 | 2 | 0 | 1 | 2  | 0  | 3  | 0  | 0  | 0  | 0  | 0  | 1  | 0  | 0  |
| <i>E. caelatus</i>       | 0 | 1 | 0 | 0 | 0 | 1 | 2 | 0 | 1 | ?  | 1  | 3  | 0  | 0  | 0  | 0  | 0  | 1  | 0  | 0  |
| <i>E. dentata</i>        | 0 | 1 | 0 | 0 | 2 | 1 | 2 | 0 | 1 | 2  | 0  | 3  | 0  | 0  | 0  | 0  | 0  | 1  | 0  | 0  |
| <i>E. flaviventralis</i> | 0 | 1 | 0 | 0 | 2 | 1 | 2 | 0 | 1 | 2  | 0  | 3  | 0  | 0  | 0  | 0  | 0  | 1  | 0  | 0  |
| <i>E. irwini</i>         | 0 | 1 | 0 | 0 | 0 | 1 | 2 | 0 | 1 | 2  | 0  | 3  | 0  | 1  | 0  | 0  | 0  | 1  | 0  | 0  |
| <i>E. lavarackorum</i>   | ? | ? | ? | 0 | 0 | 1 | 2 | 0 | 1 | 2  | 0  | 3  | 0  | 1  | 0  | 0  | 0  | 1  | 0  | ?  |
| <i>E. nadibajagu</i>     | ? | ? | ? | 0 | 0 | 1 | 2 | 0 | 1 | 2  | 0  | 3  | 0  | 0  | 0  | ?  | 0  | 1  | 0  | ?  |
| <i>E. novaeguineae</i>   | 0 | 1 | 0 | 0 | 0 | 1 | 2 | 0 | 1 | 2  | 1  | 3  | 0  | 0  | 0  | 0  | 0  | 0  | 0  | 0  |
| <i>E. oneiros</i>        | 0 | 1 | 0 | 0 | ? | 1 | 2 | 0 | 1 | 2  | 0  | 3  | 0  | 1  | 0  | 0  | 0  | 1  | 0  | 0  |
| <i>E. orestiad</i>       | 0 | 1 | 0 | 0 | 0 | 1 | 2 | 0 | 1 | ?  | 1  | 3  | 0  | 0  | 0  | 0  | 0  | 0  | 0  | 0  |
| <i>E. rhodini</i>        | 0 | 1 | 0 | 0 | 0 | 1 | 2 | 0 | 1 | 2  | 1  | 3  | 0  | 0  | 0  | 0  | 0  | 0  | 0  | 0  |
| <i>E. schultzei</i>      | 0 | 1 | 0 | 0 | 0 | 1 | 2 | 0 | 1 | 2  | 1  | 3  | 0  | 0  | 0  | 0  | 0  | 0  | 0  | 0  |
| <i>P. uberrima</i>       | ? | ? | ? | 0 | 0 | 1 | 2 | 0 | 1 | 2  | 0  | ?  | 0  | 1  | 0  | 0  | 0  | 1  | 0  | 0  |
| <i>Em. macquarii</i>     | 1 | 1 | 3 | 1 | 3 | 1 | 2 | 1 | 1 | 3  | 1  | 3  | 0  | 0  | 0  | 0  | 0  | 0  | 0  | 0  |
| <i>Em. victoriae</i>     | 1 | 1 | 3 | 1 | 3 | 1 | 2 | 1 | 1 | 3  | 1  | 3  | 0  | 0  | 0  | ?  | 0  | 0  | 0  | 0  |
| <i>M. purvisi</i>        | 0 | 0 | 0 | 0 | 1 | 1 | 0 | 2 | 0 | 0  | 1  | 2  | 0  | 0  | 0  | 0  | 0  | 0  | 0  | 0  |
| <i>M. bellii</i>         | 0 | 0 | 0 | 0 | 1 | 1 | 0 | 2 | 1 | 0  | 1  | 3  | 0  | 0  | 0  | 0  | 0  | 0  | 0  | 0  |
| <i>M. georgesi</i>       | 0 | 0 | 0 | 0 | 1 | 1 | 0 | 2 | 1 | 0  | 1  | 3  | 0  | 0  | 0  | 0  | 0  | 0  | 0  | 0  |
| <i>M. latisternum</i>    | 0 | 0 | 0 | 0 | 1 | 1 | 0 | 2 | 1 | 0  | 1  | 3  | 0  | 0  | 0  | 0  | 0  | 1  | 0  | 0  |
| <i>P. sextuberculata</i> | 0 | 2 | 3 | 0 | 0 | 0 | 1 | 0 | 0 | 0  | 2  | 1  | 1  | 1  | 0  | 0  | 0  | 1  | 0  | 1  |
| <i>R. leukops</i>        | 3 | 3 | 3 | 0 | 0 | 1 | 2 | 0 | 1 | 1  | 1  | 3  | 0  | 0  | 0  | 0  | 0  | 0  | 0  | 0  |
| QMF30817                 | ? | ? | ? | ? | ? | ? | ? | ? | ? | 2  | ?  | ?  | ?  | ?  | ?  | ?  | ?  | ?  | ?  | ?  |
| QMF30818                 | ? | ? | ? | ? | ? | ? | ? | ? | ? | 2  | ?  | ?  | ?  | ?  | ?  | ?  | ?  | ?  | ?  | ?  |

|                          | 21 | 22 | 23 | 24 | 25 | 26 | 27 | 28 | 29 | 30 | 31 | 32 | 33 | 34 | 35 | 36 | 37 | 38 | 39 | 40 |
|--------------------------|----|----|----|----|----|----|----|----|----|----|----|----|----|----|----|----|----|----|----|----|
| <i>E. albagula</i>       | 0  | 1  | 0  | 0  | 0  | 0  | 1  | 0  | 0  | 0  | 0  | 1  | 0  | 1  | 0  | 0  | 1  | 0  | 1  | 1  |
| <i>E. branderhorsti</i>  | 0  | 1  | 0  | 0  | 0  | 0  | 1  | 0  | 0  | 0  | 0  | 1  | 0  | 0  | 0  | 0  | 1  | 0  | 1  | ?  |
| <i>E. caelatus</i>       | 0  | 1  | 0  | 0  | 0  | 0  | 1  | 0  | 0  | 0  | 0  | 1  | 0  | 0  | 0  | 0  | 1  | 0  | 1  | ?  |
| <i>E. dentata</i>        | 0  | 1  | 0  | 0  | 0  | 0  | 1  | 0  | 0  | 0  | 0  | 1  | 0  | 0  | 0  | 0  | 1  | 0  | 1  | ?  |
| <i>E. flaviventralis</i> | 0  | 1  | 0  | 0  | 0  | 0  | 1  | 0  | 0  | 0  | 0  | 1  | 0  | 0  | 0  | 0  | 1  | 0  | 1  | 1  |
| <i>E. irwini</i>         | 0  | 1  | 0  | 0  | 0  | 0  | 1  | 0  | 0  | 0  | 0  | 1  | 0  | 1  | 0  | 0  | 1  | 0  | 1  | ?  |
| <i>E. lavarackorum</i>   | ?  | ?  | ?  | ?  | 0  | ?  | ?  | ?  | 0  | 0  | 0  | ?  | ?  | 1  | 0  | 0  | 1  | ?  | 1  | ?  |
| <i>E. nadibajagu</i>     | ?  | ?  | 0  | 0  | 0  | 0  | 1  | 0  | 0  | 0  | 0  | 1  | ?  | ?  | 0  | 0  | 1  | ?  | 1  | ?  |
| <i>E. novaeguineae</i>   | 0  | 1  | 0  | 0  | 0  | 0  | 1  | 1  | 0  | 0  | 0  | 1  | 0  | 0  | 0  | 0  | 1  | 0  | 1  | ?  |
| <i>E. oneiros</i>        | 0  | 1  | 0  | 0  | 0  | 0  | 1  | 1  | 0  | 0  | 0  | 1  | 0  | 1  | 0  | 0  | 1  | 0  | 1  | ?  |
| <i>E. orestiad</i>       | 0  | 1  | 0  | 0  | 0  | 0  | 1  | 1  | 0  | 0  | 0  | 1  | 0  | 0  | 0  | 0  | 1  | 0  | 1  | ?  |
| <i>E. rhodini</i>        | 0  | 1  | 0  | 0  | 0  | 0  | 1  | 1  | 0  | 0  | 0  | 1  | 0  | 0  | 0  | 0  | 1  | 0  | 1  | 1  |
| <i>E. schultzei</i>      | 0  | 1  | 0  | 0  | 0  | 0  | 1  | 1  | 0  | 0  | 0  | 1  | 0  | 0  | 0  | 0  | 1  | 0  | 1  | ?  |
| <i>P. uberrima</i>       | ?  | ?  | ?  | ?  | 0  | ?  | ?  | ?  | ?  | 0  | 0  | ?  | ?  | ?  | 0  | 0  | ?  | ?  | ?  | ?  |
| <i>Em. macquarii</i>     | 0  | 1  | 1  | 1  | 0  | 1  | 0  | 0  | 0  | 0  | 0  | 1  | 0  | 0  | 0  | 0  | 1  | 0  | 1  | 1  |
| <i>Em. victoriae</i>     | 0  | 1  | 1  | 1  | 0  | 1  | 0  | 0  | 0  | 0  | 0  | 1  | 0  | 0  | 0  | 0  | 1  | 0  | 1  | 1  |
| <i>M. purvisi</i>        | 0  | 1  | 0  | 0  | 0  | 0  | 1  | 1  | 0  | 0  | 0  | 1  | 0  | 0  | 0  | 1  | 0  | 0  | 0  | 1  |
| <i>M. bellii</i>         | 0  | 1  | 1  | 1  | 0  | 0  | 1  | 1  | 0  | 1  | 0  | 1  | 0  | 0  | 0  | 1  | 0  | 0  | 0  | 1  |
| <i>M. georgesi</i>       | 0  | 1  | 1  | 1  | 0  | 0  | 1  | 1  | 0  | 1  | 0  | 1  | 0  | 0  | 0  | 1  | 0  | 0  | 0  | 1  |
| <i>M. latisternum</i>    | 0  | 1  | 1  | 1  | 0  | 0  | 1  | 1  | 0  | 1  | 0  | 1  | 0  | 0  | 0  | 1  | 0  | 1  | 0  | 1  |
| <i>P. sextuberculata</i> | 0  | 0  | 0  | 0  | 0  | 0  | 0  | 0  | 0  | 0  | 0  | 0  | 0  | 0  | 0  | 0  | 0  | 0  | 0  | 0  |
| <i>R. leukops</i>        | 0  | 1  | 0  | 0  | 0  | 0  | 0  | 1  | 0  | 0  | 0  | 1  | 0  | 0  | 0  | 0  | 0  | 0  | 0  | 1  |
| QMF30817                 | ?  | ?  | ?  | ?  | ?  | ?  | ?  | ?  | ?  | ?  | ?  | ?  | ?  | 1  | ?  | ?  | ?  | ?  | ?  | ?  |
| QMF30818                 | ?  | ?  | ?  | ?  | ?  | ?  | ?  | ?  | ?  | ?  | ?  | ?  | ?  | 1  | ?  | ?  | ?  | ?  | ?  | ?  |



|                          | 81 | 82 | 83 | 84 | 85 | 86 | 87 | 88 | 89 | 90 | 91 | 92 | 93 | 94 | 95 | 96 | 97 | 98 | 99 | 100 |
|--------------------------|----|----|----|----|----|----|----|----|----|----|----|----|----|----|----|----|----|----|----|-----|
| <i>E. albagula</i>       | 0  | 0  | 0  | 0  | 1  | 1  | 1  | 1  | 2  | 0  | 1  | 1  | 1  | 1  | 1  | 1  | 1  | 0  | 0  | 2   |
| <i>E. branderhorsti</i>  | 0  | 0  | 0  | 0  | 1  | 1  | 1  | 1  | 2  | 0  | 1  | 1  | 1  | 0  | ?  | 1  | 1  | 0  | 0  | 2   |
| <i>E. caelatus</i>       | 1  | 0  | 0  | 0  | 1  | 1  | 1  | 1  | 1  | 0  | 0  | 1  | 1  | 0  | ?  | 0  | 1  | 0  | 1  | 1   |
| <i>E. dentata</i>        | 0  | 0  | 0  | 0  | 1  | 1  | 1  | 1  | 2  | 0  | 1  | 1  | 1  | ?  | ?  | 1  | 1  | 0  | 0  | 2   |
| <i>E. flaviventralis</i> | 0  | 0  | 0  | 0  | 1  | 1  | 1  | 1  | 2  | 0  | 1  | 1  | 1  | 0  | 1  | 1  | 1  | 0  | 0  | 2   |
| <i>E. irwini</i>         | 0  | 0  | 0  | 0  | 1  | 1  | 1  | 1  | 2  | 0  | 1  | 1  | 1  | ?  | ?  | 1  | 1  | 0  | 0  | 2   |
| <i>E. lavarackorum</i>   | ?  | ?  | ?  | ?  | ?  | ?  | ?  | ?  | ?  | ?  | ?  | ?  | ?  | ?  | ?  | ?  | ?  | ?  | ?  | ?   |
| <i>E. nadibajagu</i>     | ?  | ?  | ?  | ?  | ?  | ?  | ?  | ?  | ?  | ?  | ?  | ?  | ?  | ?  | ?  | ?  | ?  | ?  | ?  | ?   |
| <i>E. novaeguineae</i>   | 1  | 0  | 0  | 0  | 1  | 1  | 1  | 1  | 1  | 0  | 0  | 1  | 1  | ?  | ?  | 0  | 1  | 0  | 0  | 1   |
| <i>E. oneiros</i>        | 0  | 0  | 0  | 0  | 1  | 1  | 1  | 1  | 2  | 0  | 1  | 1  | 1  | ?  | ?  | 1  | 1  | 0  | 0  | 2   |
| <i>E. orestiad</i>       | 1  | 0  | 0  | 0  | 1  | 1  | 1  | 1  | 1  | 0  | 0  | 1  | 1  | ?  | ?  | 0  | 1  | 0  | 1  | 1   |
| <i>E. rhodini</i>        | 1  | 0  | 0  | 0  | 1  | 1  | 1  | 1  | 1  | 0  | 0  | 1  | 1  | 0  | 1  | 0  | 1  | 0  | 1  | 1   |
| <i>E. schultzei</i>      | 1  | 0  | 0  | 0  | 1  | 1  | 1  | 1  | 1  | 0  | 0  | 1  | 1  | ?  | ?  | 0  | 1  | 0  | 0  | 1   |
| <i>P. uberrima</i>       | ?  | ?  | ?  | ?  | ?  | ?  | ?  | ?  | ?  | ?  | ?  | ?  | ?  | ?  | ?  | ?  | ?  | ?  | ?  | ?   |
| <i>Em. macquarii</i>     | 0  | 0  | 0  | 0  | 1  | 1  | 1  | 1  | 0  | 0  | 0  | 0  | 0  | 0  | 1  | 1  | 1  | 0  | 1  | 3   |
| <i>Em. victoriae</i>     | 0  | 0  | 0  | 0  | 1  | 1  | 1  | 1  | 0  | 0  | 0  | 0  | 0  | 0  | 1  | 1  | 1  | 1  | 1  | 3   |
| <i>M. purvisi</i>        | 0  | 0  | 0  | 0  | 1  | 1  | 1  | 1  | 0  | 0  | 1  | 1  | 0  | 0  | 1  | 0  | 0  | 0  | 1  | 0   |
| <i>M. bellii</i>         | 0  | 0  | 0  | 0  | 1  | 1  | 1  | 1  | 0  | 0  | 1  | 1  | 0  | 0  | 0  | 0  | 1  | 0  | 0  | 0   |
| <i>M. georgesi</i>       | 0  | 0  | 0  | 0  | 1  | 1  | 1  | 1  | 0  | 0  | 1  | 1  | 0  | 0  | 0  | 0  | 1  | 0  | 0  | 0   |
| <i>M. latisternum</i>    | 1  | 0  | 0  | 0  | 0  | 1  | 0  | 1  | 1  | 0  | 1  | 1  | 0  | 0  | 0  | 0  | 1  | 0  | 0  | 0   |
| <i>P. sextuberculata</i> | ?  | 0  | ?  | ?  | 0  | 0  | 0  | 0  | 0  | 0  | -  | 0  | 0  | 0  | 0  | 0  | 0  | 0  | 0  | 0   |
| <i>R. leukops</i>        | 1  | 0  | 0  | 0  | 1  | 1  | 1  | 1  | 0  | 0  | 1  | 1  | 0  | 0  | 1  | 0  | 0  | 0  | 0  | 2   |
| QMF30817                 | ?  | ?  | ?  | ?  | ?  | ?  | ?  | ?  | ?  | ?  | ?  | ?  | ?  | ?  | ?  | ?  | ?  | ?  | ?  | ?   |
| QMF30818                 | ?  | ?  | ?  | ?  | ?  | ?  | ?  | ?  | ?  | ?  | ?  | ?  | ?  | ?  | ?  | ?  | ?  | ?  | ?  | ?   |

|                          | 101 | 102 | 103 | 104 | 105 | 106 |
|--------------------------|-----|-----|-----|-----|-----|-----|
| <i>E. albagula</i>       | 1   | 1   | 0   | 0   | 0   | 0   |
| <i>E. branderhorsti</i>  | 1   | 0   | 0   | 0   | 0   | 0   |
| <i>E. caelatus</i>       | 1   | 0   | 0   | 0   | 1   | 0   |
| <i>E. dentata</i>        | 1   | 0   | 0   | 0   | 0   | 0   |
| <i>E. flaviventralis</i> | 1   | 0   | 0   | 0   | 0   | 1   |
| <i>E. irwini</i>         | 1   | 1   | 0   | 0   | 0   | 0   |
| <i>E. lavarackorum</i>   | ?   | ?   | ?   | ?   | ?   | ?   |
| <i>E. nadibajagu</i>     | ?   | ?   | ?   | ?   | ?   | ?   |
| <i>E. novaeguineae</i>   | 1   | 0   | 0   | 0   | 1   | 0   |
| <i>E. oneiros</i>        | 1   | 1   | 0   | 0   | 0   | 0   |
| <i>E. orestiad</i>       | 1   | 0   | 0   | 0   | 1   | 0   |
| <i>E. rhodini</i>        | 1   | 0   | 0   | 0   | 1   | 0   |
| <i>E. schultzei</i>      | 1   | 0   | 0   | 0   | 1   | 0   |
| <i>P. uberrima</i>       | ?   | ?   | ?   | ?   | ?   | ?   |
| <i>Em. macquarii</i>     | 1   | 0   | 0   | 0   | 2   | 1   |
| <i>Em. victoriae</i>     | 1   | 0   | 1   | 0   | 0   | 1   |
| <i>M. purvisi</i>        | 1   | 0   | 0   | 0   | 2   | 1   |
| <i>M. bellii</i>         | 0   | 1   | 0   | 0   | 2   | 0   |
| <i>M. georgesi</i>       | 0   | 0   | 0   | 0   | 2   | 1   |
| <i>M. latisternum</i>    | 0   | 1   | 0   | 1   | 2   | ?   |
| <i>P. sextuberculata</i> | 0   | 0   | 0   | 0   | 0   | 0   |
| <i>R. leukops</i>        | 0   | 0   | 0   | 0   | 3   | 0   |
| QMF30817                 | ?   | ?   | ?   | ?   | ?   | ?   |
| QMF30818                 | ?   | ?   | ?   | ?   | ?   | ?   |

**Table S2.** Characters considered of taxonomic value for the Chelidae. Those that could be scored for *Elseya lavarackorum* = *Pelocomastes lavarackorum* (White and Archer, 1994) have an asterisk (\*). Notes are for clarification. Comments pertain to this study.

## Carapace

1. Posterior Bridge Strut Suture – Pleural Bone Association
  - 0 Restricted to Pleural Bone 5, rib/gomphosis 5 passes through the strut
  - 1 Overlaps pleural bones 5 & 6, rib/gomphosis 5 anterior to the strut
  - 2 Restricted to Pleural Bone 4
  - 3 Spans the boundary between pleural bones 4 & 5
2. Posterior Bridge Strut Suture – Peripheral Association
  - 0 Contacts Peripheral 7, barely contacts the pleural bones
  - 1 Contacts peripherals 7 & 8, barely contacts pleural bones
  - 2 Contacts peripherals 7 & 8, significantly contacts the pleural bones
  - 3 Contacts Peripheral 6, significantly contacts pleural bones
  - 4 Contacts Peripheral 8, significant contact with pleural bones
3. Posterior Bridge Strut Suture – Shape
  - 0 Triangular in generalised shape, shallow insertion into carapace, small
  - 1 Triangular in generalised shape, deeply inserted into carapace, large
  - 2 Square in generalised shape, deeply inserted into carapace
  - 3 Elongated and elliptical, deeply inserted into carapace
4. \*Anterior Bridge Strut Suture -- Relative Length
  - 0 Short, on Pleural Bone 1, length less than or equal to the shortest distance between its terminal end and the vertebrae
  - 1 Long, on Pleural Bone 1, length less than or equal to the shortest distance between its terminal end and the vertebrae
  - 2 Extremely short, barely contacts Pleural Bone 1

Notes: The anterior bridge strut suture extends inwards from the peripherals, usually Peripheral 3, along the inner surface of Pleural Bone 1.
5. \* Anterior Bridge Strut Suture -- Shape (Thomson et al. 1997)
  - 0 Anterior and posterior edges parallel
  - 1 Widest laterally narrowing towards the vertebrae
  - 2 Lateral and vertebral extremities equal in width with a medial constriction
  - 3 Forms a small triangular insertion
6. \* Neural Bones – Association of exposed Neural bones with the Nuchal (Pritchard and Trebbau 1984)
  - 0 Contact the Nuchal
  - 1 If present, do not contact the Nuchal
7. \*First Rib/Gomphosis Rotation (Thomson et al. 1997)
  - 0 Postero-ventrally rotated , falls posterior to the anterior bridge strut suture
  - 1 Not rotated, included in the anterior bridge strut suture
  - 2 Not rotated, falls posterior to the anterior bridge strut suture
8. \* Anterior Bridge Strut Suture -- Leading Edge
  - 0 Contacts posterior 3rd of Peripheral 2 at junction of peripheral 2 and Pleural Bone 1
  - 1 Contacts the middle of Peripheral 3 at junction of peripheral 3 and Pleural Bone 1
  - 2 Contacts the junction of peripherals 2 & where they join Pleural Bone 1
  - 3 Contacts the middle of Peripheral 4 at junction of Peripheral 4 and Pleural Bone 1
9. \*Suture of Rib 1 with Rib 2
  - 0 Adjacent to the contact between thoracic vertebrae 1 & 2
  - 1 Completely anterior to the contact between thoracic vertebrae 1 & 2
10. \* Anterior Bridge Strut Suture – Angle
  - 0 Approximately 160 degrees or greater
  - 1 Approximately 155 degrees

2 Approximately 140 - 150 degrees

3 Approximately 120 degrees

4 180 degrees (horizontal)

Note: This angle is defined against the line joining the junction of peripherals 3 and 4 and the junction of thoracic vertebrae 1 & 2. It is the obtuse angle. Subject to ontogenetic variation, so similar aged animals need to be compared across taxa.

11. \*Width of first Vertebral Scute (Thomson et al. 1997)

0 Significantly wider than vertebral scutes 2 & 3

1 Approximately same width as vertebral scutes 2 & 3

2 Narrower than vertebral scutes 2 & 3

12. \* Neural bones (Pritchard 1988; Thomson and Georges 1996)

0 Neurals 7-8, exposed, contiguous

1 Six (6) exposed, contiguous neurals

2 Neural 1 absent, not exposed

3 Neurals 1-2 absent, not exposed

4 All neurals absent, not exposed

13. \*Carapace -- Vertebral Keel

0 absent

1 present

14. \*Carapace -- Nuchal Bay (Gaffney et al. 2006)

0 absent

1 present

Comment: Subject to ontogenetic variation in Chelidae. First indications are in the departure of the anterior carapace from the classical ovoid shape; the anterior carapace squares off; in the oldest largest individuals, the most anterior extent of the carapace is on the forward boundary of Marginals M2.

15. \*Carapace -- Carinate

0 absent

1 present

16. \* Plastron -- Hinge

0 Plastral Hinge absent

1 Plastral Hinge present

Comment:

17. \* Rib 1 continues along Rib 2

0 Absent

1 Present

18. \*Cervical Scute

0 Present

1 Absent

19. \*Nuchal Bone -- Elongation

0 Maximum width and length approximately equal

1 Maximum length greatly exceeds maximum width

20. Thoracic Rib 11

0 Contacts Pleural Bone 8

1 Contacts Suprapygol

Note: Thoracic Rib 11 is often referred to as the second caudal rib

21. Width of pleural bones 7 & 8

0 Pleural Bones 7 & 8 approximately equal

1 Pleural Bone 8 noticeably wider than Pleural Bone 7

2 Pleural Bone 7 noticeably wider than Pleural Bone 8

22. Suprapygol -- Contacts (Thomson and Mackness 1999)

0 Contacts Pygal and Peripheral 11 (close to pygal)

1 Contacts Pygal and Peripheral 11 close to Peripheral 10

2 Contacts Pygal and peripherals 10 & 11.

23. Rib/gomphosis of Pleural Bone 6 -- Contacts
  - 0 Contacts posterior 1/4 of Peripheral 8
  - 1 Contacts middle of Peripheral 8
24. Pleural Bone 7 – Contact with Peripherals
  - 0 Contacts posterior edge of Peripheral 9
  - 1 Contacts middle of Peripheral 9
25. Cervical scute – Association with Peripherals
  - 0 Not enclosed by peripherals
  - 1 Enclosed by peripherals
26. Pelvic Ileum Carapace Suture – Shape
  - 0 Triangular
  - 1 Square
27. Proximity of Rib heads to Neural Spine
  - 0 Close with little space
  - 1 Spread wide but ribs straight
  - 2 Spread very wide and ribs curved away from pleural bones
  - 3 Spread wide with ribs 1-4 curved
28. Pygal dorsally inflected over tail
  - 0 absent
  - 1 moderately
  - 2 highly inflected
29. \* Costal Scute 1 -- Posterior Sulcus
  - 0 Contacts middle of Marginal 5
  - 1 Contacts posterior of Marginal 5
30. \* Anterio-Posterior ridge on pleural bones between rib heads
  - 0 Absent
  - 1 Present
31. \* First rib arches away from thoracic vertebrae
  - 0 Absent
  - 1 Present

Note: First rib forms a convex arch to accommodate an enlarged *longissimus dorsi* muscle
32. Musk ducts
  - 0 absent
  - 1 present
33. Plastron -- deeply concave in vicinity of humerals
  - 0 absent
  - 1 present
34. \* Intergular Scute -- notched anteriorly
  - 0 absent
  - 1 present
35. \* Pleural concavity forms a shallow trench for the length of the carapace above thoracic arches
  - 0 absent
  - 1 present
36. \* Marginals -- Relative Size of M1 and M2 (McCord and Thomson 2002)
  - 0 Marginals 1 and 2 equal in size
  - 1 Marginal 2 larger than Marginal 1
  - 2 Marginal 2 smaller than Marginal 1
37. \* Carapace -- Topography (Friol et al. 2015)
  - 0 Convex
  - 1 Highly convex
  - 2 Acuminate (tapering to a point)
  - 3 Bi-carinate (two keel-like projections)
  - 4 Pyramided

- 5 Highly pyramided
38. Posterior protuberance of the Vertebral Scutes (Friol et al. 2015)
- 0 Absent
  - 1 Present
39. \* Carapace -- Shape (Friol et al. 2015)
- 0 Not oval
  - 1 Oval
40. Lateral widening of Pleural Bone 3
- 0 Absent
  - 1 Present
41. Sulcus between Costal Scute 2 & Costal Scute 3
- 0 Contacts Peripheral 7
  - 1 Contacts Peripheral 6
42. Sulcus between Costal Scute 3 & Costal Scute 4
- 0 Contacts Peripheral 9
  - 1 Contacts Peripheral 8
43. \* Carapace -- Most anterior point (Thomson et al. 1997)
- 0 Marginal 1
  - 1 Marginal 2
44. Posterior carapace serrated in adults (Thomson et al. 2006)
- 0 Absent
  - 1 Present
45. Ilium sutural surface with carapace (Thomson and Mackness 1999)
- 0 Elongated antero-posteriorly
  - 1 Broadly triangular
46. Anterior ventral profile of the Nuchal
- 0 Concave
  - 1 Convex
47. Gomphotic bridge suture at Peripheral 4
- 0 Absent
  - 1 Present
48. Two gomphotic sutures at Peripheral 7
- 0 Present
  - 1 Absent
49. Two gomphotic sutures on posterior edge of Nuchal
- 0 Absent
  - 1 Present
50. \* Anterior bridge strut suture -- Ventral blade on posterior edge
- 0 Absent
  - 1 Present
51. \* Anterior bridge strut suture -- Ventral blade on anterior edge
- 0 Absent
  - 1 Present
52. \* Rib/gomphosis of Pleural Bone 5 rotated and striated
- 0 Present
  - 1 Absent
53. \* Sinusoidal leading edge Vertebral 2
- 0 Present
  - 1 Absent
54. \* Nuchal Bay -- formation
- 0 Absent
  - 1 Present formed from proximal inclination of 2nd peripheral
  - 2 Present formed from posterior recession of first peripheral



55. Vomer -- contacts Premaxilla

0 Absent

1 Present

## **Plastron**

56. \* Plastron -- Mesoplastra (Gaffney et al. 2006)

0 present

1 absent

57. \* Entoplastron Simple Diamond Shape (Gaffney et al. 2006)

0 present

1 absent

58. Longitudinal ridge where the Bridge forms the Plastron

0 absent

1 present

59. Plastron -- depressed between the two Ischium sutures

0 absent

1 present

60. Plastron -- Femoral region extends laterally (lobes)

0 absent

1 present

61. \* Intergular Scute -- wider than gular scutes

0 absent

1 present

62. \* Plastron: Pectoral region extends laterally (lobes)

0 absent

1 present

63. \* Pectoral Scute -- Midline length less than lateral length

0 absent

1 present

64. \* Anterior Plastral Lobe (Thomson and Georges 2016)

0 Square in general shape

1 Tapered and narrow

65. Dorsal spur on the Entoplastron

0 Absent

1 Present

## **Pelvis**

66. Pelvic Ileum -- Suture to Carapace (Thomson and Mackness 1999)

0 Contacts Suprapygial, pleurals 7 & 8

1 Contacts Suprapygial, Pleural Bone 8 and close to the suture between pleurals 7 & 8

2 Contacts Suprapygial, Pleural Bone 8 with broad separation from Pleural Bone 7

3 Contacts pleurals 7 & 8 only

67. \* Ischium -- Suture with Plastron extends to the edge of the Plastron

0 absent

1 present

68. Pubis -- elongate and narrow

0 absent

1 present

69. Pubis -- almost reaches junction of Hyoplastron and Xyphiplastron

0 absent

1 present

70. Ischium -- postero-dorsally rotated (Thomson and Mackness 1999)  
0 absent  
1 present
71. Pelvis -- latero-posteriorly rotated (Thomson and Mackness 1999)  
0 absent  
1 present

## **Skull**

72. Vomer Bone (Friol et al. 2015)  
0 absent  
1 present
73. Nasal Bone (Friol et al. 2015; Gaffney 1977)  
0 absent  
1 present
71. Quadrado-jugal Bone (Friol et al. 2015; Gaffney 1977)  
0 present  
1 absent
75. Jugal Bone -- Lateral extension of the Jugal Bone (Friol et al. 2015)  
0 absent  
1 present
76. Frontal Bone -- Process anterior to Frontal Bone (Friol et al. 2015)  
0 absent  
1 present
77. Skull: Dorso-ventral Flattening of the Skull (Friol et al. 2015)  
0 None  
1 Extreme  
2 Moderate  
3 Curvilinear  
4 Other
78. Lateral Parietal region (Friol et al. 2015)  
0 Wide anterior and reduced posterior region  
1 Rectangular  
2 Moderately concave  
3 Extremely concave  
4 Anterior region reduced
79. Vomer and Palatine are in contact (Thomson et al. 2006)  
0 absent  
1 present
80. Parietal-Squamosal connection visible in dorsal view (Friol et al. 2015)  
0 absent  
1 present
81. Squamosal Crista visible in posterior view (Friol et al. 2015)  
0 horizontal  
1 vertical
82. Convexity of the inner region of the Dentary (Friol et al. 2015)  
0 absent  
1 present
83. Median squamosal region elevated (Friol et al. 2015)  
0 absent  
1 present
84. Shape of the contact between Opisthotic and Squamosal bones in posterior view (Friol et al. 2015)  
0 straight

- 1 curvilinear
- 85. Prearticular Fossa (Friol et al. 2015)
  - 0 Short
  - 1 Long
- 86. Inner margin of Mandible lower than outer margin (Friol et al. 2015)
  - 0 Absent
  - 1 Present
- 87. Mandible divided (Gaffney 1977)
  - 0 Absent
  - 1 Present
- 88. Crista Posterior of the Squamosal
  - 0 Absent
  - 1 Present
- 89. Alveolar Ridge in mouth (Thomson et al. 2006)
  - 0 Absent
  - 1 Present on Dentary only
  - 2 Present on Dentary and Rhamphotheca
- 90. Basioccipital (Friol et al. 2015)
  - 0 Wide and shortened
  - 1 Narrow and elongated
- 91. Pterygoid -- Lateral process open (Friol et al. 2015)
  - 0 Absent
  - 1 Present
- 92. Auditory fossa -- number (Friol et al. 2015)
  - 0 Three
  - 1 Two
- 93. Opisthotic Crista – position in relation to the skull (Friol et al. 2015)
  - 0 parallel
  - 1 perpendicular
- 94. Lingual Ridge in mouth (Thomson et al. 2006)
  - 0 Absent
  - 1 Present
- 95. Parietal Arch
  - 0 Wide
  - 1 Narrow
  - 2 Absent
- 96. Rhamphotheca of upper jaw (Thomson et al. 2006)
  - 0 Thin without modification
  - 1 Thickened, enlarged, to form crushing plate
- 97. Symphysial Hook on lower jaw (Gaffney 1977)
  - 0 Present
  - 1 Reduced or absent
- 98. Triturating surfaces of upper jaw meet at the midline (Thomson et al. 2006)
  - 0 Absent
  - 1 Present
- 99. Vomer contacts Pterygoids (Thomson et al. 2015)
  - 0 Absent
  - 1 Present

## Head & Neck

- 100. Head Shield (Thomson et al. 2015)
  - 0 Present with lateral extensions to tympanum wrapping around dorsal tympanum

- 1 Present with lateral extension to tympanum
- 2 Restricted to dorsal surface of head
- 3 Absent
- 101. Neck Tubercles (Thomson and Georges 2009)
  - 0 Large cornified
  - 1 Small or absent
- 102. Head shield -- deeply fenestrated (Thomson et al. 2006)
  - 0 Absent
  - 1 Present
- 103. Macrocephaly in adults
  - 0 Absent
  - 1 Present
- 104. Leading and Trailing eye-spot in iris (Thomson et al. 2006)
  - 0 Absent
  - 1 Present
- 105. Iris ring color (Thomson et al. 2015)
  - 0 Liquid (Absent)
  - 1 Green
  - 2 Gold
  - 3 White
- 106. Temporal scales cornified (Thomson and Georges 2016)
  - 0 Present
  - 1 Absent

## References

- Friol, N. R., de Barros Molina, F., el Dine Zaher, H. (2015). A new species of *Phrynops* from Southern Brazil (Testudines, Chelidae), with comments on the phylogeny of the genus. 5th Turtle Evolution Symposium 3:e986v1 (DOI - 10.7287/PEERJ.PREPRINTS.986).
- Gaffney, E. S. (1977). The side-necked turtle family Chelidae : a theory of relationships using shared derived characters. American Museum Novitates 2620:1–28.
- Gaffney, E. S., Tong, H., Meylan, P. A. (2006). Evolution of the side-necked turtles: The families Bothremydidae, Euraxemydidae, and Araripemydidae. Bulletin of the American Museum of Natural History 300:1–318.
- McCord, W. P., Thomson, S. A. (2002). A New Species of *Chelodina* (Testudines: Pleurodira: Chelidae) from Northern Australia. Journal of Herpetology 36:255–267.
- Pritchard, P. C. H. (1988). A survey of neural bone variation among recent chelonian species, with functional interpretations. Acta Zoologica Cracoviensia 31(2):11–27.
- Pritchard, P. C. H., Trebbau, P. (1984). The Turtles of Venezuela. Contributions in Herpetology 2:1–403.
- Thomson, S. A., Amepou, Y., Anamiato, J., Georges, A. (2015). A new species and subgenus of *Elseya* (Testudines: Pleurodira: Chelidae) from New Guinea. Zootaxa 4006:59–82.
- Thomson, S. A., Georges, A. (1996). Neural bones in chelid turtles. Chelonian Conservation and Biology 2:82– 86.
- Thomson, S. A., Georges, A. (2009). *Myuchelys* gen. nov. -- a new genus for *Elseya latisternum* and related forms of Australian freshwater turtle (Testudines: Pleurodira: Chelidae). Zootaxa 2053:32–42.
- Thomson, S. A., Georges, A. (2016). A new species of freshwater turtle of the genus *Elseya* (Testudinata: Pleurodira: Chelidae) from the Northern Territory of Australia. Zootaxa 4061:18–28.
- Thomson, S. A., Georges, A., Limpus, C. J. (2006). A new species of freshwater turtle in the genus *Elseya* (Testudines: Chelidae) from central coastal Queensland, Australia. Chelonian Conservation and Biology 5:74–86.
- Thomson, S. A., Mackness, B. S. (1999). Fossil turtles from the Early Pliocene Bluff Downs Local Fauna, with a description of a new species of *Elseya*. Transactions of the Royal Society of NSW 123:101–105.
- Thomson, S. A., White, A., Georges, A. (1997). Re-evaluation of *Emydura lavarackorum*: Identification of a living fossil. Memoirs of the Queensland Museum 42:327–336.

**Table S3.** Frequency of carapaces with irregular scutes in a population of *Emydura macquarii nigra* on Fraser Island. Only carapaces with irregularities involving insertions or deletions are included. Other variations in scute or sulci shape are not included. N = 670 [from Georges, 1982].

| Type                                  | Raw Frequency | Percentage Frequency |
|---------------------------------------|---------------|----------------------|
| Cervical divided or partially divided | 27            | 4.0                  |
| Cervical fused to adjacent marginal   | 3             | 0.4                  |
| Cervical deleted                      | 4             | 0.6                  |
| Marginals inserted                    | 15            | 2.2                  |
| Marginals deleted                     | 8             | 1.2                  |
| Costal Scutes inserted                | 29            | 4.3                  |
| Costal Scutes deleted                 | 1             | 0.1                  |
| Vertebrals inserted                   | 15            | 2.2                  |
| Vertebrals deleted                    | 2             | 0.3                  |
| <b>Total Carapace</b>                 | <b>89</b>     | <b>13.3</b>          |

**Table S4.** Frequency of plastra with irregular scutes in a population of *Emydura macquarii nigra* on Fraser Island. Only plastra with major irregularities involving insertions or deletions are included. Other variations in scute or sulci shape are not included. N = 670 [from Georges, 1982].

| Type                                                 | Raw Frequency | Percentage Frequency |
|------------------------------------------------------|---------------|----------------------|
| <i>Insertions confluent with the plastron margin</i> |               |                      |
| Between the intergular and gular                     | 31            | 4.6                  |
| Between the intergular and humeral                   | 15            | 2.2                  |
| Between the humeral and pectoral                     | 1             | 0.1                  |
| Between the pectoral and abdominal                   | 1             | 0.1                  |
| Between the abdominal and femoral                    | 1             | 0.1                  |
| Between the femoral and anal                         | 4             | 0.6                  |
| <i>Other insertions</i>                              | 20            | 3.0                  |
| <i>Deletions</i>                                     | 0             | 0.0                  |
| <b>Total plastron</b>                                | <b>73</b>     | <b>10.9</b>          |
